# Supplementary material for: Heavy atom-free semiconducting polymer with high singlet oxygen quantum yield for prostate cancer synergistic phototherapy
Source: Royal Society of Chemistry journal article supplement (doi:10.1039/c9qm00158a), 2019-01-01
Supplement: c9qm00158a1.pdf [file c9qm00158a1.pdf]

## Heavy atom free semiconducting polymer with high singlet oxygen quantum yield for prostate cancer synergistic phototherapy

Jian Shen<sup>a</sup>, Zhen Ke<sup>b</sup>, Jianjiao Chen<sup>b</sup>, Dengfeng Zou<sup>b</sup>, Ligu Sun<sup>a\*</sup>, Jianhua Zou<sup>bc\*</sup>

*a. Department of Urology, Changshu No. 2 people's Hospital, 215500, Jiangsu, P.R. China. Email: 13338729262@163.com*

*b. School of Pharmacy, Guilin Medical University, Guilin 541004, Guangxi, P.R. China.*

*c. Jiangsu Laboratory of Advanced Materials, Department of Chemistry and Materials Engineering, Changshu Institute of Technology, Changshu, 215500, Jiangsu, P.R. China, Email: zoujh93@126.com*

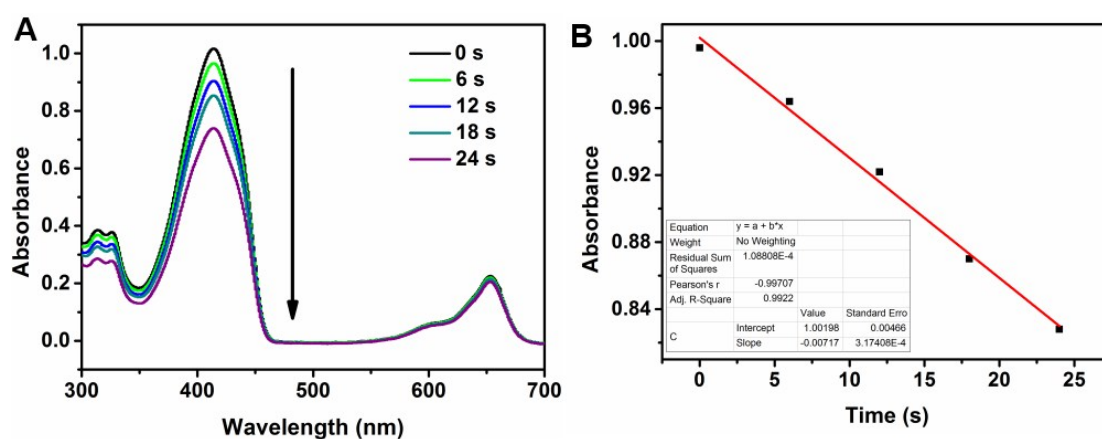

**Figure S1 A** Degradation of DPBF with the presence of MB; **B. Linear fitting of the degradation of the absorbance**

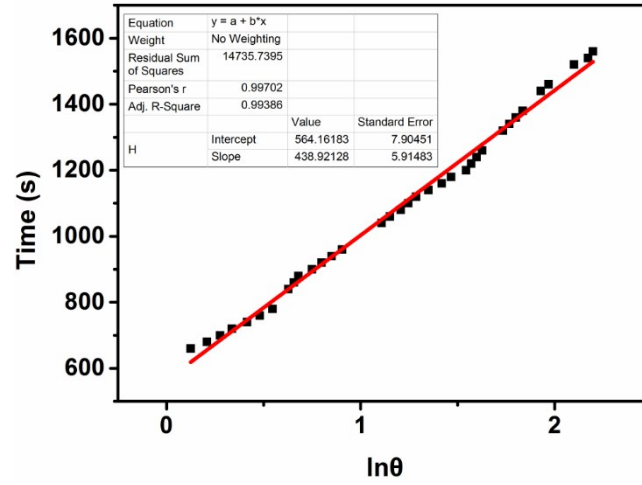

Figure S2 Linear fitting of  $-\ln\theta$  and time
